# Supplementary material
Source: publisher site journal article supplement (https://www.dovepress.com/article/452305)
Supplement: Supplementary file 1 [file get_supplementary_file.php]

# Supplementary Appendix

## Supplementary Methods

### Healthcare Resource Utilization Categories

- All healthcare resource utilization (HCRU) events were described for eight HCRU categories:
  - Physician office visits, categorized as 0, 1-4, 5-8, 9-12, 12-24 and ≥25:
    - General practitioner (GP) visits: non-respiratory-related and all-cause
  - Specialist visits:
    - Referrals to specialist: non-respiratory-related and all-cause
  - Emergency department (ED) visits:
    - Non-respiratory-related and all-cause visits
  - Hospital admissions, number of spells, including day cases:
    - Respiratory, non-respiratory, and all-cause
  - Hospital admissions, number of spells, excluding day cases:
    - Respiratory, non-respiratory and all-cause
  - Hospital attendance, length of stay, overall*:* cumulative number of days per patient (including values of zero for patients not admitted to hospital)
    - Respiratory, non-respiratory and all-cause
  - Hospital admissions, length of stay, ≥1 overnight: cumulative number of days per patient, only reported for patients who remained overnight
    - Respiratory, non-respiratory and all-cause
  - Day cases, number of spells (discharge date = admission date):
    - Respiratory, non-respiratory and all-cause

### Statistical Analysis

#### Calculation of annualized HCRU and HCRU costs

- The annualized HCRU and annualized costs for each of OCS pattern were calculated as follows:
  - Annualized HCRU:
  - Annualized cost:

#### Calculation of HCRU rates

- HCRU rates were calculated as follows:

### Table S1. Selected Corticosteroid-related Adverse Outcomes 21 Used in the Analysis of Costs by HRCU Category

| **Corticosteroid-related adverse outcome** | **HCRU category** | | |
| --- | --- | --- | --- |
| **ED visit** | **Specialist visit** | **Inpatient visit** |
| **Adverse outcome  (accident and emergency diagnosis code)** | **Main specialty description** | **ICD-10 code (primary diagnosis)** |
|  |  |  |  |
| Cataract/glaucoma | Ophthalmological conditions | Medical Ophthalmology, Ophthalmology | H25–H28 (cataract) H40–42 (glaucoma) |
| Chronic kidney disease | – | – | N17, N18.3, N18.4, N18.5, N19 |
| Cardiovascular disease | Cardiac conditions/ cerebrovascular conditions/other vascular conditions | Cardiology, Cardiothoracic Surgery, Elderly Medicine, General Internal Medicine, Neurology | MI I21-I22, HF I50, peripheral artery disease I70, I73.9, cardiomyopathy I42, arrhythmia I48, stroke I63.9, I64, I69.4 |
| Depression/anxiety | Psychiatric conditions | Adult Mental Health, Child and Adolescent Psychiatry, Forensic Psychiatry, Medical Psychotherapy, Old Age Psychiatry | F20.4, F25.1, F32, F33, F40, F41 |
| Hypertension | – | Cardiology, Clinical Pharmacology, General Internal Medicine | I10 |
| Osteoporosis/osteoporotic fractures | – | Elderly Medicine, Rheumatology, Trauma and Orthopaedic | M80–M85 |
| Peptic ulcera | Gastrointestinal conditions | Gastroenterology, General Internal Medicine | K25–K27 |
| Pneumonia | – | General Internal Medicine, Respiratory Medicine | J12–J18 |
| Renal impairment | – | Renal Medicine |  |
| Sleep apnoea | – | – | G47.3 |
| Sleep disorders | – | – | G47 (excluding G47.3) |
| Type 2 diabetes mellitus | Diabetes and other endocrinological conditions | Endocrinology, General Internal Medicine, Ophthalmology, Renal Medicine | E11 |
| Missing | Diagnosis not classifiable/missing | – | – |
| Other cause | Any other adverse outcome code | – | – |

**ED**, emergency department; **HCRU**, healthcare resource utilization; **ICD-10**, International Statistical Classification of Diseases and Related Health Problems 10th Revision.

aFor inpatient coding, the specific term for this adverse outcome was ‘peptic ulcer disease’.

### Table S2. HCRU for Non-respiratory-related Consultations in UK Patients by Intermittent OCS Prescribing Pattern and OCS Use Status

|  | **HCRU unit** | **Patients (n)** | **Mean (95% CI)** | **SD** | **Median (IQR)** | **Annualized HCRU (HCRU events/patient-year)** | **p-valuea,b** |
| --- | --- | --- | --- | --- | --- | --- | --- |
| **GP visits** | **Episodes** |  |  |  |  |  |  |
| Non-OCS | 6,130,164 | 136,025 | 45.07 (44.74, 45.39) | 61.66 | 24 (9, 56) | 4.48 | p<0.0001 |
| Intermittent OCS | 7,431,526 | 146,775 | 50.63 (50.32, 50.94) | 60.20 | 31 (14, 64) | 5.93 |
| One-off | 2,779,915 | 73,430 | 37.86 (37.52, 38.19) | 46.46 | 23 (10, 47) | 5.00 | p<0.0001 |
| Less frequent | 2,478,381 | 40,478 | 61.23 (60.58, 61.87) | 66.22 | 41 (20, 79) | 6.08 |
| Frequent | 2,173,230 | 32,867 | 66.12 (65.34, 66.90) | 72.24 | 43 (20, 86) | 7.49 |
| **All admissions** | **Episodes** |  |  |  |  |  |  |
| Non-OCS | 88,350 | 16,207 | 5.45 (5.20, 5.70) | 16 | 3 (1, 6) | 0.56 | p<0.0001 |
| Intermittent OCS | 205,655 | 36,081 | 5.70 (5.47, 5.93) | 23 | 3 (2, 6) | 0.64 |
| One-off | 87,642 | 17,150 | 5.11 (4.85, 5.37) | 17.63 | 3 (1, 6) | 0.65 | p<0.0001 |
| Less frequent | 57,470 | 10,328 | 5.56 (5.72, 8.18) | 8.18 | 3 (2, 7) | 0.54 |
| Frequent | 60,543 | 8,603 | 7.04 (6.23, 7.84) | 37.99 | 4 (2, 7) | 0.76 |

| **Day cases** | **Episodes** |  |  |  |  |  |  |
| --- | --- | --- | --- | --- | --- | --- | --- |
| Non-OCS | 54,576 | 13,016 | 4.19 (3.91, 4.48) | 16.75 | 2 (1, 4) | 0.42 | p<0.0001 |
| Intermittent OCS | 124,409 | 29,669 | 4.19 (3.93, 4.45) | 22.99 | 2 (1, 4) | 0.46 |
| One-off | 53,007 | 13,976 | 3.79 (3.54, 4.05) | 15.43 | 2 (1, 4) | 0.48 | p<0.0001 |
| Less frequent | 33,504 | 8,575 | 3.91 (3.76, 4.05) | 6.74 | 2 (1, 4) | 0.37 |
| Frequent | 37,898 | 7,118 | 5.32 (4.37, 6.28) | 40.99 | 2 (1, 5) | 0.56 |
| **Admissions (length of stay)** | **Days** |  |  |  |  |  |  |
| Non-OCS | 284,484 | 16,207 | 24.93 (23.37-26.5) | 85.38 | 6 (2-22) | 2.07 | p<0.0001 |
| Intermittent OCS | 607,027 | 36,081 | 23.25 (22.40-24.09) | 69.56 | 6 (2-20) | 2.43 |
| One-off | 247,588 | 17,150 | 20.90 (19.53-22.16) | 70.02 | 5 (2-16) | 2.18 | p<0.0001 |
| Less frequent | 177,455 | 10,328 | 23.44 (21.69-25.19) | 77.69 | 7 (2-20) | 2.16 |
| Frequent | 181,984 | 8,603 | 27.19 (25.80-28.58  ) | 57.83 | 9 (3-27) | 3.37 |

| **Admissions excluding day cases (length of stay)** | **Days** |  |  |  |  |  |  |
| --- | --- | --- | --- | --- | --- | --- | --- |
| Non-OCS | 54,576 | 13,016 | 4.19 (3.91, 4.48) | 16.75 | 2 (1, 4) | 0.30 | p<0.0001 |
| Intermittent OCS | 124,409 | 29,669 | 4.19 (3.93, 4.45) | 22.99 | 2 (1, 4) | 0.35 |
| One-off | 54,576 | 13,016 | 3.79 (3.54, 4.05) | 15.43 | 2 (1, 4) | 0.30 | p<0.0001 |
| Less frequent | 53,007 | 13,976 | 3.91 (3.76, 4.05) | 6.74 | 2 (1, 4) | 0.37 |
| Frequent | 33,504 | 8,575 | 5.32 (4.37, 6.28) | 40.99 | 2 (1, 5) | 0.31 |
| **All prescriptions (including OCS)c** | **Records** |  |  |  |  |  |  |
| Non-OCS | 17,998,131 | 128,053 | 140.55 (138.95, 142.15) | 291.91 | 31 (8, 137) | 15.30 | p<0.0001 |
| Intermittent OCS | 22,312,435 | 145,758 | 153.08 (151.56, 154.60) | 296.44 | 49 (15, 160) | 18.09 |
| One-off | 7,673,891 | 71,774 | 106.92 (105.19, 108.65) | 236.48 | 30 (9, 99) | 14.30 | p<0.0001 |
| Less frequent | 7,313,705 | 40,782 | 179.34 (176.26, 182.41) | 317.03 | 65 (22, 198) | 17.86 |
| Frequent | 7,324,839 | 33,202 | 220.61 (216.71, 224.51) | 362.53 | 91 (31, 263) | 25.22 |

**CI**, confidence interval; **HCRU**, healthcare resource utilization; **GP**, general practitioner; **IQR**, interquartile range; **OCS**, oral corticosteroid; **SD**, standard deviation.

aComparisons between the number of episodes in the OCS cohort and the non-OCS cohort were made using the Mann-Whitney test.

bComparisons between the number of episodes for the three categories of intermittent OCS prescribing pattern were made using the chi-square test.

**c**Non-respiratory prescription defined as prescriptions not being within BNF Chapter 3.

### Table S3. HCRU for all-cause consultations in UK patients by intermittent OCS prescribing pattern and OCS use status

|  | **HCRU unit** | **Patients (n)** | **Mean (95% CI)** | **SD** | **Median (IQR)** | **Annualized HCRU (HCRU events/patient-year)** |
| --- | --- | --- | --- | --- | --- | --- |
| **GP visits** | **Episodes** |  |  |  |  |  |
| Non-OCS | 6,336,992 | 136,266 | 46.50 (46.17, 46.84) | 55.38 | 25 (9, 58) | 4.63 |
| Intermittent OCS | 8,710,937 | 147,782 | 58.94 (58.61, 59.28) | 48.09 | 38 (18, 76) | 6.90 |
| One-off | 3,211,507 | 74,257 | 43.25 (42.89, 43.60) | 49.35 | 28 (13, 55) | 5.73 |
| Less frequent | 2,911,461 | 40,591 | 71.73 (71.04, 72.41) | 70.72 | 51 (27, 92) | 7.09 |
| Frequent | 2,587,969 | 32,934 | 78.58 (77.74, 79.42) | 77.94 | 54 (28, 103) | 8.89 |
| **Emergency department visits** | **Episodes** |  |  |  |  |  |
| Non-OCS | 50,253 | 14,758 | 3.41 (3.34, 3.47) | 3.92 | 2 (1, 4) | 0.66 |
| Intermittent OCS | 137,973 | 33,950 | 4.06 (3.99, 4.14) | 6.97 | 3 (1, 5) | 1.09 |
| One-off | 65,478 | 16,976 | 3.86 (3.74, 3.98) | 8.11 | 2 (1, 5) | 1.55 |
| Less frequent | 40,183 | 9,639 | 4.17 (4.06, 4.28) | 5.48 | 3 (1, 5) | 0.70 |
| Frequent | 32,312 | 7,335 | 4.41 (4.27, 4.54) | 5.76 | 3 (1, 5) | 0.84 |
| **Specialist visits** | **Episodes** |  |  |  |  |  |
| Non-OCS | 465,032 | 20,182 | 23.04 (22.60, 23.48) | 32.11 | 12 (5, 29) | 0.10 |
| Intermittent OCS | 1,116,590 | 43,820 | 25.48 (24.89, 26.07) | 63.35 | 14 (6, 32) | 0.11 |
| One-off | 503,945 | 21,909 | 23.00 (21.92, 24.08) | 81.49 | 12 (5, 29) | 0.13 |
| Less frequent | 326,936 | 12,310 | 26.56 (25.91, 27.21) | 36.78 | 15 (6, 34) | 0.10 |
| Frequent | 285,709 | 9,601 | 29.76 (29.01, 30.51) | 37.35 | 18 (7, 38) | 0.11 |

| **All admissions** | **Episodes** |  |  |  |  |  |
| --- | --- | --- | --- | --- | --- | --- |
| Non-OCS | 92,193 | 16,503 | 5.59 (5.34, 5.83) | 16.01 | 3 (1, 6) | 0.57 |
| Intermittent OCS | 226,262 | 37,662 | 6.01 (5.78, 6.23) | 22.45 | 3 (2, 7) | 0.68 |
| One-off | 94,223 | 17,864 | 5.27 (5.02, 5.53) | 17.67 | 3 (1, 6) | 0.67 |
| Less frequent | 63,513 | 10,760 | 5.90 (5.74, 6.06) | 8.52 | 4 (2, 7) | 0.57 |
| Frequent | 68,526 | 9,038 | 7.58 (6.81, 8.35) | 37.34 | 4 (2, 8) | 0.82 |
| **Day cases** | **Episodes** |  |  |  |  |  |
| Non-OCS | 55,355 | 13,204 | 4.19 (3.91, 4.48) | 16.65 | 2 (1, 4) | 0.42 |
| Intermittent OCS | 129,045 | 30,564 | 4.22 (3.97, 4.48) | 22.72 | 2 (1, 4) | 0.47 |
| One-off | 54,676 | 14,383 | 3.80 (3.55, 4.05) | 15.29 | 2 (1, 4) | 0.48 |
| Less frequent | 34,848 | 8,831 | 3.95 (3.81, 4.09) | 6.73 | 2 (1, 4) | 0.38 |
| Frequent | 39,521 | 7,350 | 5.38 (4.45, 6.30) | 40.40 | 2 (1, 5) | 0.57 |
| **Admissions excluding day cases** | **Episodes** |  |  |  |  |  |
| Non-OCS | 36,838 | 11,810 | 3.12 (3.06, 3.18) | 3.45 | 2 (1, 4) | 0.32 |
| Intermittent OCS | 97,217 | 28,343 | 3.43 (3.36, 3.50) | 5.87 | 2 (1, 4) | 0.38 |
| One-off | 39,547 | 12,801 | 3.09 (2.97, 3.21) | 7.14 | 2 (1, 4) | 0.39 |
| Less frequent | 28,665 | 8,193 | 3.50 (3.41, 3.59) | 4.31 | 2 (1, 4) | 0.34 |
| Frequent | 29,005 | 7,349 | 3.95 (3.84, 4.06) | 4.78 | 3 (1, 5) | 0.43 |

| **Admissions (length of stay)** | **Days** |  |  |  |  |  |
| --- | --- | --- | --- | --- | --- | --- |
| Non-OCS | 315,101 | 16,503 | 19.09 (17.97, 20.22) | 73.55 | 3 (0, 14) | 1.95 |
| Intermittent OCS | 734,763 | 37,662 | 19.51 (18.87, 20.15) | 63.17 | 4 (1, 15) | 2.20 |
| One-off | 285,565 | 17,864 | 15.99 (15.10, 16.87) | 60.50 | 3 (0, 10) | 2.04 |
| Less frequent | 213,589 | 10,760 | 19.85 (18.53, 21.17) | 69.71 | 4 (1, 15) | 1.93 |
| Frequent | 235,609 | 9,038 | 26.07 (24.84, 27.30) | 59.51 | 6 (1, 25) | 2.83 |
| **Admissions excluding day cases (length of stay)** | **Days** |  |  |  |  |  |
| Non-OCS | 315,101 | 11,810 | 26.68 (25.13, 28.23) | 85.77 | 7 (2, 24) | 2.71 |
| Intermittent OCS | 734,763 | 28,343 | 25.92 (25.09, 26.76) | 71.67 | 7 (2, 23) | 2.91 |
| One-off | 285,565 | 12,801 | 22.31 (21.09, 23.53) | 70.48 | 6 (2, 17) | 2.83 |
| Less frequent | 213,589 | 8,193 | 26.07 (24.36, 27.78) | 78.87 | 7 (3, 23) | 2.54 |
| Frequent | 235,609 | 7,349 | 32.06 (30.58, 33.54) | 64.53 | 10 (3, 34) | 3.47 |
| **Any prescription (including OCS)** | **Records** |  |  |  |  |  |
| Non-OCS | 18,301,835 | 128,497 | 142.43 (140.82, 144.04) | 293.90 | 33 (8, 139) | 15.50 |
| Intermittent OCS | 27,226,646 | 148,118 | 183.82 (182.21, 185.42) | 314.97 | 74 (27, 205) | 21.72 |
| One-off | 9,346,657 | 73,976 | 126.35 (124.56, 128.13) | 247.67 | 46 (46, 17) | 16.89 |
| Less frequent | 9,023,645 | 40,870 | 220.79 (217.52, 224.06) | 337.35 | 102 (42, 259) | 21.99 |
| Frequent | 8,856,344 | 33,272 | 266.18 (262.02, 270.34) | 386.86 | 132 (52, 327) | 30.43 |

**CI**, confidence interval; **GP**, general practitioner; **HCRU**, healthcare resource utilization; **IQR**, interquartile range; **OCS**, oral corticosteroid; **SD**, standard deviation.
